# Supplementary material for: Non-invasive and high-throughput interrogation of exon-specific isoform expression
Source: PubMed Central journal article supplement (PMC8189919; doi:10.1038/s41556-021-00678-x), 2021-06-03

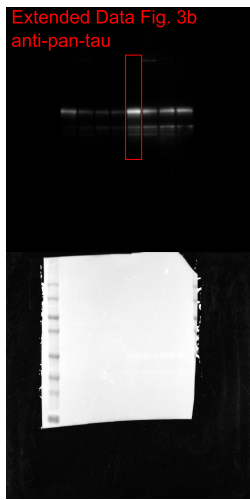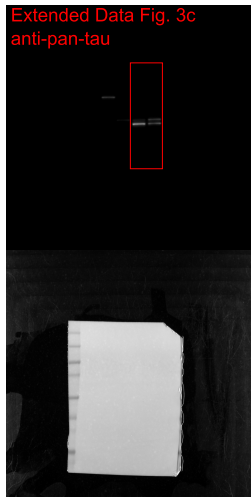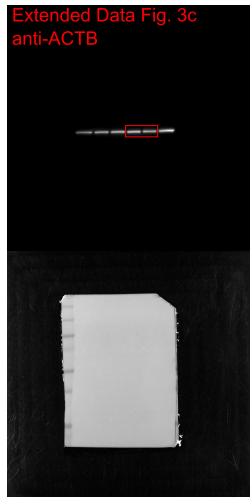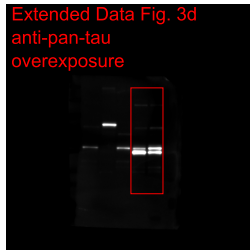

Supplement: 41556_2021_678_MOESM18_ESM.pdf [file 41556_2021_678_MOESM18_ESM.pdf]
